# Supplementary material
Source: Springer Nature journal article supplement (https://www.springermedizin.de/resource/supplementary/12936_2005_168_MOESM1_ESM.pdf/9547048)

Pre-Study

(25 children per village)

- Blood smears
- Malaria serology

Month 0

- Children assigned to Prophylaxis or no prophylaxis groups
- Prophylaxis initiated
- Height, weight
- Malaria serology

Month 5

- Height, weight
- Malaria serology
- Pre-vaccination serology
- First dose of measles or DTP vaccination

Month 6

- Second dose of DTP vaccination

Month 7

- Malaria serology
- Post-vaccination serology

Months 8-12

- Antimalarial drug provided
- Mortality surveillance

Available for analysis

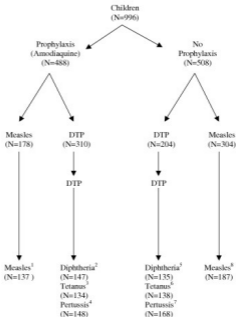

Supplement: MOESM1 [file 9547048]
